# Supplementary material for: Comparative In Vivo Biocompatibility of Cellulose-Derived and Synthetic Meshes in Subcutaneous Transplantation Models
Source: PubMed Central journal article supplement (PMC11558565; doi:10.1021/acs.biomac.4c00984), 2024-10-08

## ***Supporting Information S1:***

### **Comparative *in vivo* biocompatibility of cellulose-derived and synthetic meshes in subcutaneous transplantation models**

*Nina M.M. Peltokallio*<sup>1,\*</sup>, *Rubina Ajdary*<sup>2</sup>, *Guillermo Reyes*<sup>2,\*</sup>, *Esko Kankuri*<sup>3</sup>, *Jouni J.T.*

*Junnila*<sup>4</sup>, *Satu Kuure*<sup>5</sup>, *Anna S. Meller*<sup>6</sup>, *Jani Kuula*<sup>7</sup>, *Eija Raussi-Lehto*<sup>7,8</sup>, *Hannu Sariola*<sup>9</sup>,

*Outi M. Laitinen-Vapaavuori*<sup>1</sup>, *Orlando J. Rojas*<sup>2,10,11,12,\*</sup>

<sup>1</sup> Department of Equine and Small Animal Medicine, Faculty of Veterinary Medicine, University of Helsinki, Viikintie 49, FI-00014 Helsinki University, Finland.

<sup>2</sup> Biobased Colloids and Materials, Department of Bioproducts and Biosystems, School of Chemical Engineering, Aalto University, P.O. Box 16300, FI-00076 Aalto, Espoo, Finland.

<sup>3</sup> Department of Pharmacology, Faculty of Medicine, University of Helsinki, P.O. Box 29, Helsinki, Finland.

<sup>4</sup> EstiMates Oy, Kamreerintie 8, FI-022770 Espoo, Finland.

<sup>5</sup> GM unit, Helsinki Institute of Life Science/STEMM, Research Program's Unit, Faculty of Medicine, University of Helsinki, P.O. Box 63, Helsinki, Finland.

<sup>6</sup> Laboratory Animal Centre, HiLIFE, University of Helsinki, P.O. Box 29, Helsinki, Finland

<sup>7</sup> Department of Neuroscience and Biomedical Engineering, School of Science, Aalto University, P.O. Box 16300, FI-00076 Aalto, Espoo, Finland.

<sup>8</sup> Customer-oriented Wellbeing and Health Services, Metropolia University of Applied Sciences, PL 4000, FI-00079 Metropolia, Helsinki, Finland.

<sup>9</sup> Department of Pathology, Faculty of Medicine, University of Helsinki, P.O. Box 63, Helsinki, Finland.

<sup>10</sup> Bioproducts Institute, Department of Chemical and Biological Engineering, The University of British Columbia, 2360 East Mall, Vancouver, BC V6T 1Z3, Canada.

<sup>11</sup> Department of Wood Science, University of British Columbia, 2385 East Mall, Vancouver, BC V6T 1Z4, Canada.

<sup>12</sup> Department of Chemistry, University of British Columbia, 2036 Main Mall, Vancouver, BC V6T 1Z1, Canada.

**\* Corresponding authors:** Nina M.M. Peltokallio (Email: [nina.peltokallio@helsinki.fi](mailto:nina.peltokallio@helsinki.fi)), Guillermo Reyes ([guillermo.reyes@vtt.fi](mailto:guillermo.reyes@vtt.fi)), Orlando J. Rojas ([orlando.rojas@ubc.ca](mailto:orlando.rojas@ubc.ca)).

**Figure S1.** Wound grading after subcutaneous implantation of bacterial nanocellulose (BNC), regenerated cellulose (RC), 3D-printed cellulose nanofibrils (CNFs), polypropylene (PP) and polydioxanone in a rat subcutaneous transplantation model. Normal wound healing right after implantation of CNF and PP (a), sham and PP (b, c), RC and PP (d), and BNC and PP (e) at 0 (a), 1 (b), 7 (c), 30 (d), and 90 (e) days post-implantation. Cellulose-derived implants on the right, PP on the left side. Wound reactions classified as (f) mild swelling (PP), (g) clear discharge (RC, PP), and (h) abscess (PP).

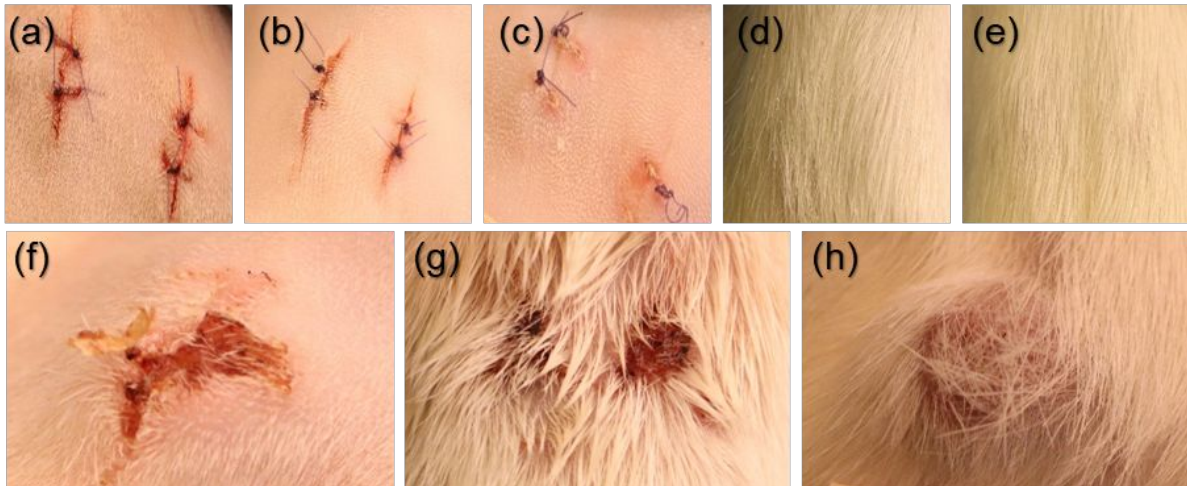

Supplement: bm4c00984_si_001.pdf [file bm4c00984_si_001.pdf]
