# Supplementary material for: Comparative In Vivo Biocompatibility of Cellulose-Derived and Synthetic Meshes in Subcutaneous Transplantation Models
Source: PubMed Central journal article supplement (PMC11558565; doi:10.1021/acs.biomac.4c00984), 2024-10-08
Supplement: bm4c00984_si_002.pdf [file bm4c00984_si_002.pdf]

## ***Supporting Information S2:***

### **Comparative *in vivo* biocompatibility of cellulose-derived and synthetic meshes in subcutaneous transplantation models**

*Nina M.M. Peltokallio*<sup>1,\*</sup>, *Rubina Ajdary*<sup>2</sup>, *Guillermo Reyes*<sup>2,\*</sup>, *Esko Kankuri*<sup>3</sup>, *Jouni J.T.*

*Junnila*<sup>4</sup>, *Satu Kuure*<sup>5</sup>, *Anna S. Meller*<sup>6</sup>, *Jani Kuula*<sup>7</sup>, *Eija Raussi-Lehto*<sup>7,8</sup>, *Hannu Sariola*<sup>9</sup>,

*Outi M. Laitinen-Vapaavuori*<sup>1</sup>, *Orlando J. Rojas*<sup>2,10,11,12,\*</sup>

<sup>1</sup> Department of Equine and Small Animal Medicine, Faculty of Veterinary Medicine, University of Helsinki, Viikintie 49, FI-00014 Helsinki University, Finland.

<sup>2</sup> Biobased Colloids and Materials, Department of Bioproducts and Biosystems, School of Chemical Engineering, Aalto University, P.O. Box 16300, FI-00076 Aalto, Espoo, Finland.

<sup>3</sup> Department of Pharmacology, Faculty of Medicine, University of Helsinki, P.O. Box 29, Helsinki, Finland.

<sup>4</sup> EstiMates Oy, Kamreerintie 8, FI-022770 Espoo, Finland.

<sup>5</sup> GM unit, Helsinki Institute of Life Science/STEMM, Research Program's Unit, Faculty of Medicine, University of Helsinki, P.O. Box 63, Helsinki, Finland.

<sup>6</sup> Laboratory Animal Centre, HiLIFE, University of Helsinki, P.O. Box 29, Helsinki, Finland

<sup>7</sup> Department of Neuroscience and Biomedical Engineering, School of Science, Aalto University, P.O. Box 16300, FI-00076 Aalto, Espoo, Finland.

<sup>8</sup> Customer-oriented Wellbeing and Health Services, Metropolia University of Applied Sciences, PL 4000, FI-00079 Metropolia, Helsinki, Finland.

<sup>9</sup> Department of Pathology, Faculty of Medicine, University of Helsinki, P.O. Box 63, Helsinki, Finland.

<sup>10</sup> Bioproducts Institute, Department of Chemical and Biological Engineering, The University of British Columbia, 2360 East Mall, Vancouver, BC V6T 1Z3, Canada.

<sup>11</sup> Department of Wood Science, University of British Columbia, 2385 East Mall, Vancouver, BC V6T 1Z4, Canada.

<sup>12</sup> Department of Chemistry, University of British Columbia, 2036 Main Mall, Vancouver, BC V6T 1Z1, Canada.

**\* Corresponding authors:** Nina M.M. Peltokallio (Email: [nina.peltokallio@helsinki.fi](mailto:nina.peltokallio@helsinki.fi)), Guillermo Reyes ([guillermo.reyes@vtt.fi](mailto:guillermo.reyes@vtt.fi)), Orlando J. Rojas ([orlando.rojas@ubc.ca](mailto:orlando.rojas@ubc.ca)).



|    |      |           |           |          |          |          |          |           |          |           |
|----|------|-----------|-----------|----------|----------|----------|----------|-----------|----------|-----------|
| 44 | PP   | 0         | 0         | 0        | 0        | 0        | 0        | 0         | 0        | 1         |
| 47 | BC   | 0         | 1         | 0        | 0        | 0        | 0        | 0         | 0        | 0         |
| 47 | PP   | 0         | 0         | 0        | 0        | 1        | 0        | 0         | 0        | 0         |
| 48 | RC   | 0         | 0         | 0        | 0        | 0        | 0        | 0         | 0        | 1         |
| 48 | PP   | 1         | 0         | 0        | 0        | 0        | 0        | 0         | 0        | 0         |
| 51 | SHAM | 0         | 1         | 0        | 0        | 0        | 0        | 0         | 0        | 0         |
| 51 | PP   | 1         | 0         | 0        | 0        | 0        | 0        | 0         | 0        | 0         |
| 52 | BC   | 0         | 0         | 0        | 0        | 0        | 0        | 1         | 0        | 0         |
| 52 | PP   | 0         | 0         | 0        | 0        | 0        | 1        | 1         | 0        | 0         |
| 55 | RC   | 0         | 0         | 0        | 0        | 0        | 0        | 0         | 0        | 1         |
| 55 | PP   | 1         | 0         | 0        | 0        | 0        | 0        | 0         | 0        | 0         |
| 56 | CNF  | 0         | 0         | 0        | 0        | 0        | 0        | 0         | 0        | 1         |
| 56 | PP   | 1         | 0         | 0        | 0        | 1        | 0        | 0         | 0        | 0         |
| 59 | BC   | 0         | 1         | 0        | 0        | 0        | 0        | 0         | 0        | 0         |
| 59 | PP   | 0         | 0         | 0        | 0        | 0        | 0        | 0         | 1        | 0         |
| 60 | RC   | 1         | 0         | 0        | 0        | 1        | 0        | 0         | 0        | 0         |
| 60 | PP   | 1         | 0         | 0        | 0        | 0        | 0        | 0         | 0        | 0         |
| 63 | CNF  | 0         | 0         | 0        | 0        | 0        | 0        | 0         | 0        | 1         |
| 63 | PP   | 0         | 0         | 0        | 0        | 0        | 0        | 1         | 0        | 0         |
| 64 | SHAM | 0         | 0         | 0        | 0        | 0        | 0        | 0         | 0        | 1         |
| 64 | PP   | 1         | 0         | 0        | 0        | 0        | 0        | 0         | 0        | 0         |
| 67 | RC   | 0         | 0         | 0        | 0        | 0        | 0        | 0         | 0        | 1         |
| 67 | PP   | 1         | 0         | 0        | 0        | 0        | 0        | 1         | 0        | 0         |
| 68 | CNF  | 0         | 0         | 0        | 0        | 1        | 0        | 0         | 0        | 0         |
| 68 | PP   | 0         | 0         | 0        | 0        | 0        | 0        | 1         | 0        | 0         |
| 71 | SHAM | 0         | 0         | 0        | 0        | 0        | 0        | 0         | 0        | 1         |
| 71 | PP   | 1         | 0         | 0        | 0        | 0        | 0        | 0         | 0        | 0         |
| 72 | BC   | 0         | 0         | 0        | 0        | 0        | 0        | 0         | 0        | 1         |
| 72 | PP   | 0         | 0         | 0        | 0        | 0        | 0        | 1         | 0        | 0         |
| 75 | CNF  | 0         | 0         | 0        | 0        | 0        | 0        | 0         | 0        | 1         |
| 75 | PP   | 0         | 1         | 0        | 0        | 0        | 0        | 0         | 0        | 0         |
| 76 | SHAM | 0         | 0         | 0        | 0        | 0        | 0        | 0         | 0        | 1         |
| 76 | PP   | 0         | 0         | 0        | 0        | 0        | 0        | 1         | 0        | 0         |
| 79 | BC   | 0         | 1         | 0        | 0        | 0        | 0        | 0         | 0        | 0         |
| 79 | PP   | 0         | 1         | 0        | 0        | 0        | 0        | 0         | 0        | 0         |
| 80 | RC   | 0         | 0         | 0        | 0        | 0        | 0        | 0         | 0        | 1         |
| 80 | PP   | 0         | 1         | 0        | 0        | 0        | 0        | 0         | 0        | 0         |
|    |      | <b>32</b> | <b>15</b> | <b>2</b> | <b>0</b> | <b>7</b> | <b>1</b> | <b>12</b> | <b>8</b> | <b>12</b> |



|    |      |           |           |          |          |          |          |          |          |           |
|----|------|-----------|-----------|----------|----------|----------|----------|----------|----------|-----------|
| 45 | PP   | 0         | 0         | 0        | 0        | 0        | 0        | 1        | 0        | 0         |
| 46 | BC   | 1         | 0         | 0        | 0        | 0        | 0        | 0        | 0        | 0         |
| 46 | PP   | 1         | 0         | 0        | 0        | 0        | 0        | 0        | 0        | 0         |
| 49 | CNF  | 0         | 0         | 0        | 1        | 0        | 0        | 0        | 0        | 0         |
| 49 | PP   | 0         | 0         | 1        | 0        | 0        | 0        | 0        | 0        | 0         |
| 50 | SHAM | 0         | 0         | 0        | 0        | 0        | 0        | 0        | 1        | 0         |
| 50 | PP   | 0         | 1         | 0        | 0        | 0        | 0        | 0        | 0        | 0         |
| 53 | BC   | 1         | 0         | 0        | 0        | 0        | 0        | 0        | 0        | 0         |
| 53 | PP   | 0         | 1         | 0        | 0        | 0        | 0        | 0        | 0        | 0         |
| 54 | RC   | 1         | 0         | 0        | 0        | 0        | 0        | 0        | 0        | 0         |
| 54 | PP   | 1         | 0         | 0        | 0        | 0        | 0        | 0        | 0        | 0         |
| 57 | SHAM | 1         | 0         | 0        | 0        | 0        | 0        | 0        | 0        | 0         |
| 57 | PP   | 0         | 0         | 0        | 0        | 0        | 0        | 1        | 0        | 0         |
| 58 | BC   | 0         | 1         | 0        | 0        | 0        | 0        | 0        | 0        | 0         |
| 58 | PP   | 1         | 0         | 0        | 0        | 0        | 1        | 0        | 0        | 0         |
| 61 | RC   | 1         | 0         | 0        | 0        | 0        | 0        | 0        | 0        | 0         |
| 61 | PP   | 0         | 0         | 0        | 0        | 0        | 0        | 0        | 1        | 0         |
| 62 | CNF  | 0         | 0         | 0        | 0        | 0        | 0        | 0        | 0        | 1         |
| 62 | PP   | 0         | 0         | 0        | 0        | 0        | 0        | 0        | 0        | 1         |
| 65 | BC   | 1         | 0         | 0        | 0        | 0        | 0        | 0        | 0        | 0         |
| 65 | PP   | 1         | 0         | 0        | 0        | 0        | 0        | 0        | 0        | 0         |
| 66 | RC   | 1         | 0         | 0        | 0        | 0        | 0        | 0        | 0        | 0         |
| 66 | PP   | 1         | 0         | 0        | 0        | 0        | 0        | 0        | 0        | 0         |
| 69 | CNF  | 0         | 1         | 0        | 0        | 0        | 0        | 0        | 0        | 0         |
| 69 | PP   | 0         | 1         | 0        | 0        | 0        | 0        | 0        | 0        | 0         |
| 70 | SHAM | 1         | 0         | 0        | 0        | 0        | 0        | 0        | 0        | 0         |
| 70 | PP   | 1         | 0         | 0        | 0        | 0        | 0        | 0        | 0        | 0         |
| 73 | RC   | 1         | 0         | 0        | 0        | 0        | 0        | 0        | 0        | 0         |
| 73 | PP   | 0         | 0         | 0        | 0        | 0        | 0        | 0        | 1        | 0         |
| 74 | CNF  | 0         | 0         | 1        | 0        | 0        | 0        | 0        | 0        | 0         |
| 74 | PP   | 0         | 1         | 0        | 0        | 0        | 0        | 0        | 0        | 0         |
| 77 | SHAM | 0         | 0         | 0        | 0        | 0        | 0        | 0        | 0        | 1         |
| 77 | PP   | 1         | 0         | 0        | 0        | 0        | 0        | 0        | 0        | 0         |
| 78 | BC   | 0         | 1         | 0        | 0        | 0        | 0        | 0        | 0        | 0         |
| 78 | PP   | 0         | 1         | 0        | 0        | 0        | 0        | 0        | 0        | 0         |
|    |      | <b>28</b> | <b>18</b> | <b>4</b> | <b>1</b> | <b>0</b> | <b>1</b> | <b>3</b> | <b>4</b> | <b>22</b> |

FBR = foreign body reaction

AI = acute inflammation

CI = chronic inflammation

GT = granulation tissue

RC = regenerated cellulose

BC = bacterial nanocellulose

CNF = 3-D-printed cellulose nanofibrils

SHAM = polydioxanone (PDS®, Johnson&Johnson, USA)

PP = polypropylene

Excluded = non-representative samples, technical processing issues, premature euthanasia (1) due to study-unrelated cause
